# Supplementary material for: Electrochemical aptasensor detection of electron transfer flavoprotein subunit beta for leptospirosis diagnosis
Source: Royal Society of Chemistry journal article supplement (doi:10.1039/d3an01064c), 2023-01-01
Supplement: d3an01064c1.pdf [file d3an01064c1.pdf]

## Supplemental Information

### Electrochemical Aptasensor Detection of Electron Transfer Flavoprotein Subunit Beta for Leptospirosis Diagnosis

Uraiwan Kositanont<sup>a</sup>, Chatchawan Srisawat<sup>b</sup>, Sirinapa Sripinitchai<sup>b</sup>, Charin Thawornkuno<sup>c</sup>,  
Thanyarat Chaibun<sup>d</sup>, Sinthu Karunaithas<sup>d</sup>, Chamras Promptmas<sup>d</sup>, Benchaporn  
Lertanantawong<sup>d\*</sup>

<sup>a</sup>Faculty of Public Health, Thammasat University, Pahol Yothin Rd., Klong Luang, Pathum Thani 12121, Thailand,

<sup>b</sup>Department of Biochemistry, Faculty of Medicine Siriraj Hospital, Mahidol University, Wang Lang Rd., Bangkok Noi, Bangkok 10700, Thailand,

<sup>c</sup>Department of Molecular Tropical Medicine and Genetics, Faculty of Tropical Medicine, Mahidol University, Ratchawithi Road, Ratchathewi, Bangkok 10400, Thailand,

<sup>d</sup>Biosensors Laboratory, Department of Biomedical Engineering, Faculty of Engineering, Mahidol University, Phutthamonthon 4 Road, Salaya, Nakhon Pathom 73170, Thailand

\*Corresponding author

Figure S1: Performance of electrodes at different steps of the sensor preparation.

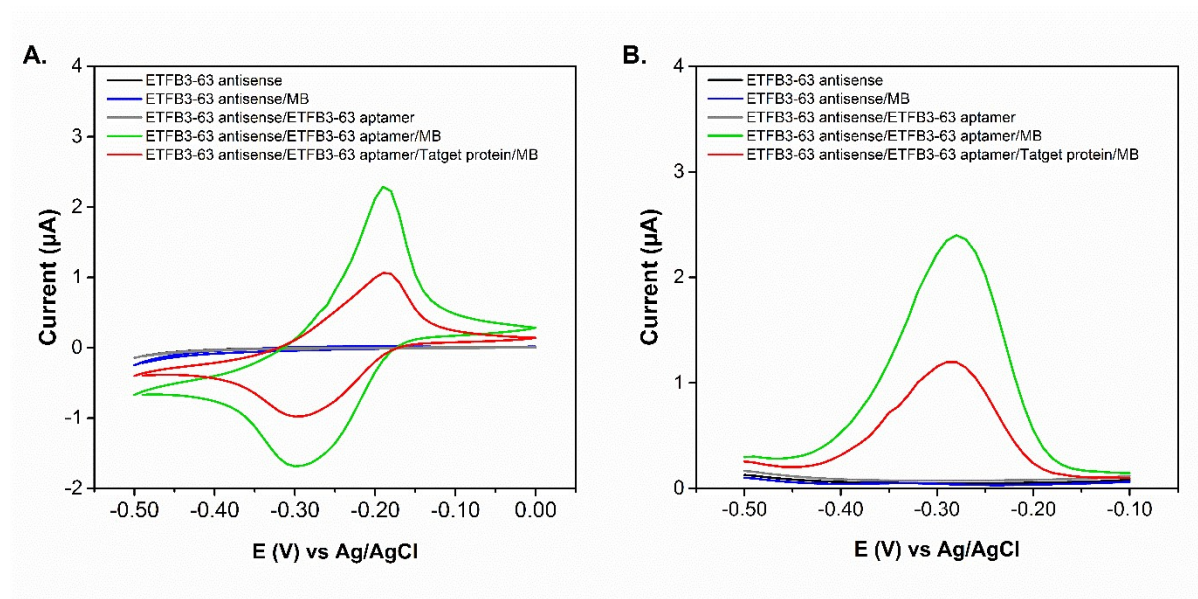

Figure S1: Performance of electrodes at different steps of the sensor preparation. A) Cyclic voltammetry of electrode performance. B) DPV of sensor performance with different stages of sensor preparation.
